# Supplementary material
Source: publisher figshare collection journal article supplement (https://sage.figshare.com/ndownloader/files/15051191)
Supplement: Supplementary file 1 [file 15051191]

## Supplementary file

### Illustrative Table

*Conceptual comparison among career values, work values, career anchors, and career orientations instruments and domains within four dimensions of work values*

| CVQ-career values | WIP-work values  | SWVI-work values         | COI + Internationalism-career anchors             | PCAS and BCAS-career orientations | 4 dimensions of work values |
|-------------------|------------------|--------------------------|---------------------------------------------------|-----------------------------------|-----------------------------|
| Independence      | Autonomy         | Independence             | Autonomy/independence                             | Self-directed                     | Intrinsic work values       |
| Specialization    |                  | Intellectual stimulation | Pure challenge<br>Technical functional competence |                                   |                             |
|                   | Internal comfort |                          |                                                   | Values-driven                     |                             |
|                   |                  | Creativity               | Entrepreneurial creativity                        |                                   |                             |
| Variety           |                  | Variety                  |                                                   |                                   |                             |
| Mobility          |                  |                          | Internationalism                                  | Physical Mobility                 | Prestige work values        |
|                   | Achievement      | Achievement              |                                                   |                                   |                             |
| Management        |                  | Management               | Managerial competence                             |                                   |                             |
|                   | Status           | Prestige                 |                                                   |                                   |                             |
| Salary            |                  | Economic returns         |                                                   |                                   | Extrinsic work values       |
|                   | Safety           | Security                 | Security/stability                                |                                   |                             |
|                   | External comfort | Surroundings             |                                                   |                                   |                             |
| Social            | Altruism         | Associates Altruism      | Service/dedication to a cause                     |                                   | Social work values          |
| W-L Balance       |                  | Way of life              | Life style                                        | Psychological mobility            |                             |
|                   |                  | Supervisory relations    |                                                   |                                   |                             |
|                   |                  | Aesthetics               |                                                   |                                   |                             |

*Note.* CVQ = Career Values Questionnaire; WIP = Work Importance Profiler; SWVI = Super's Work Values Inventory; COI = Career Orientation Inventory; PCAS = Protean Career Attitudes Scale; BCAS = Boundaryless Career Attitudes Scale. The four dimensions of work values are based on Jin and Rounds' (2012) meta-analysis of longitudinal studies on work values.
